# Supplementary material
Source: MDPI journal article supplement (https://www.mdpi.com/2304-6740/11/5/210)
Supplement: s1 [file s1]

## Supplementary materials

Sodium carbonate (0.200 mmol/L) was introduced to control the ion strength and alkalinity. Hydrochloric acid (0.100 mol/L) and sodium hydroxide (0.100 mol/L) were used to adjust the pH of the simulated algae-laden water. The coagulation procedure was consistent with what was stated in the text. Aluminum sulfate octadecahydrate (with hydrophobic silica or ferrous sulfate heptahydrate) was added into the solution at the beginning of rapid stirring. Water samples were collected 2 cm underwater to determine Zeta potential when stirring for 1 min using a Zeta potential analyzer (Zetasizer Nano ZS90, Malvern, UK).

As shown in Fig. S1, the coagulation performance of aluminum sulfate octadecahydrate in neutral conditions was prior to that in acid conditions. Restabilization was more likely to occur in acid conditions, which was unfavorable for coagulation. Residual Al of aluminum sulfate octadecahydrate decreased a lot with the addition of hydrophobic silica, both in neutral and acidic conditions (Fig. S2).

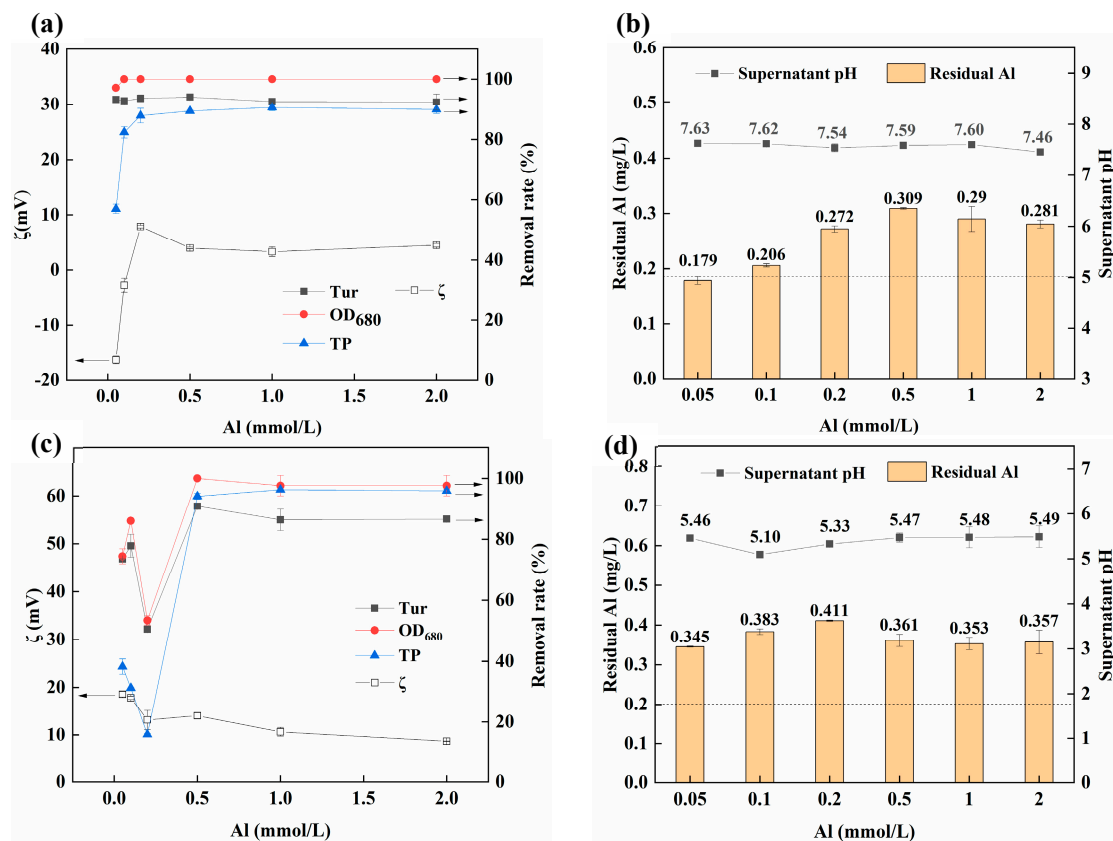

**Figure S1.** Coagulation performance of aluminum sulfate octadecahydrate in (a) (b) neutral conditions and (c) (d) acid conditions.

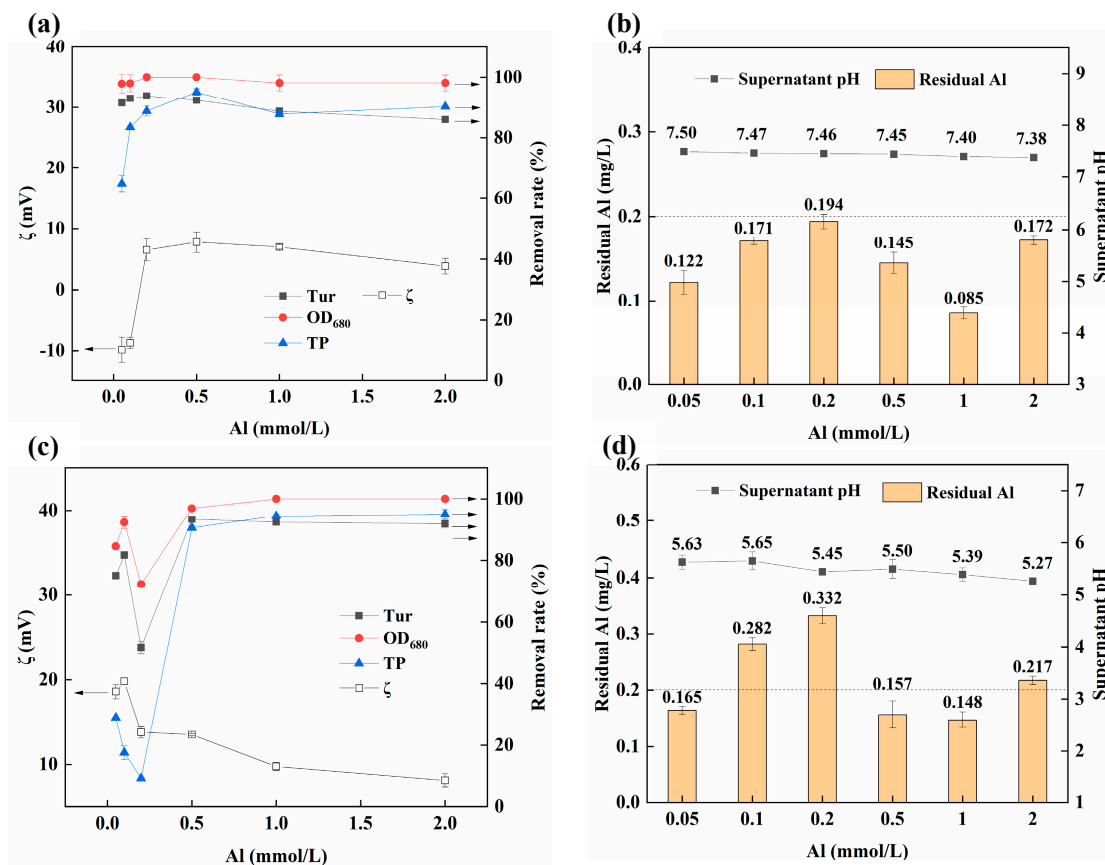

**Figure S2.** Coagulation performance of hydrophobic silica-assisted aluminum sulfate octadecahydrate in (a) (b) neutral conditions and (c) (d) acid conditions.

Ferrous sulfate heptahydrate was introduced for synergistic coagulation to further improve the removal efficiency of TP. As can be seen in Fig. S3a, with the increase of  $n(\text{Fe}):n(\text{Al})$  from 0:1 to 1:1, the removal rate of TP increased from 70.05% to 80.71%. When it continued to rise to 3:1, the removal rate of TP was basically maintained at 89.01%. When  $n(\text{Fe}):n(\text{Al})$  was 2:1, concentration of residual Al dropped to 0.208 mg/L.  $n(\text{Fe}):n(\text{Al})$  in the range of 1:1 to 3:1 was chosen for the subsequent three-variable three-level experiments.

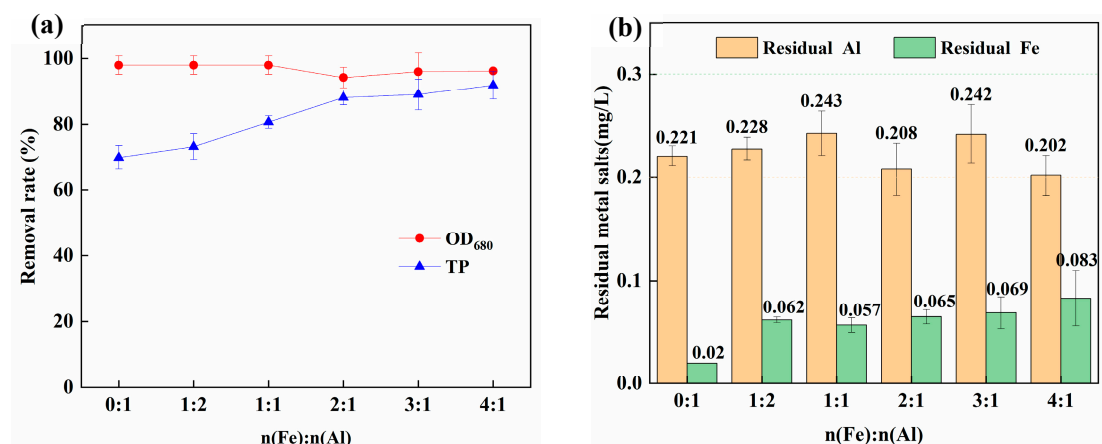

**Figure S3.** Coagulation performance of different  $n(\text{Fe}):n(\text{Al})$  in neutral conditions.

Where the concentration of aluminum was fixed at 0.05 mmol/L, and the concentration of ferrous iron varied according to the value of  $n(\text{Fe}):n(\text{Al})$ .

**Table S1.** Details from BBD for 17 runs of jar tests <sup>a</sup>.

| Run | Input variables |    |    | Output responses |                 |                 |       |                 |       |                 |        |
|-----|-----------------|----|----|------------------|-----------------|-----------------|-------|-----------------|-------|-----------------|--------|
|     | A               | B  | C  | R1 <sup>b</sup>  |                 | R2 <sup>c</sup> |       | R3 <sup>d</sup> |       | R4 <sup>e</sup> |        |
|     |                 |    |    | EV <sup>f</sup>  | PV <sup>g</sup> | EV              | PV    | EV              | PV    | EV              | PV     |
| 1   | -1              | -1 | 0  | 0.166            | 0.160           | 0.078           | 0.066 | 83.46           | 85.30 | 94.64           | 94.44  |
| 2   | 1               | -1 | 0  | 0.128            | 0.130           | 0.090           | 0.047 | 88.72           | 86.12 | 96.49           | 94.16  |
| 3   | -1              | 1  | 0  | 0.158            | 0.156           | 0.086           | 0.129 | 81.89           | 84.36 | 94.64           | 96.96  |
| 4   | 1               | 1  | 0  | 0.112            | 0.118           | 0.084           | 0.096 | 86.47           | 84.75 | 96.49           | 96.68  |
| 5   | -1              | 0  | -1 | 0.182            | 0.187           | 1.280           | 1.226 | 81.10           | 78.59 | 92.86           | 90.24  |
| 6   | 1               | 0  | -1 | 0.148            | 0.146           | 1.154           | 1.194 | 80.45           | 82.25 | 85.96           | 85.46  |
| 7   | -1              | 0  | 1  | 0.280            | 0.282           | 0.568           | 0.591 | 20.16           | 18.35 | -7.46           | -6.98  |
| 8   | 1               | 0  | 1  | 0.260            | 0.255           | 0.582           | 0.573 | 13.39           | 15.89 | -5.36           | -2.76  |
| 9   | 0               | -1 | -1 | 0.166            | 0.166           | 1.054           | 1.089 | 82.68           | 83.41 | 79.21           | 82.02  |
| 10  | 0               | 1  | -1 | 0.158            | 0.155           | 1.254           | 1.234 | 77.95           | 77.91 | 82.14           | 82.44  |
| 11  | 0               | -1 | 1  | 0.262            | 0.265           | 0.530           | 0.550 | 15.75           | 15.77 | -12.50          | -12.80 |
| 12  | 0               | 1  | 1  | 0.260            | 0.260           | 0.552           | 0.517 | 19.69           | 18.95 | -5.36           | -8.18  |
| 13  | 0               | 0  | 0  | 0.198            | 0.166           | 0.074           | 0.116 | 90.55           | 87.69 | 92.86           | 91.10  |
| 14  | 0               | 0  | 0  | 0.158            | 0.166           | 0.122           | 0.116 | 88.19           | 87.69 | 92.86           | 91.10  |
| 15  | 0               | 0  | 0  | 0.158            | 0.166           | 0.116           | 0.116 | 85.83           | 87.69 | 89.29           | 91.10  |
| 16  | 0               | 0  | 0  | 0.142            | 0.166           | 0.122           | 0.116 | 88.19           | 87.69 | 91.23           | 91.10  |
| 17  | 0               | 0  | 0  | 0.172            | 0.166           | 0.144           | 0.116 | 85.71           | 87.69 | 89.29           | 91.10  |

<sup>a</sup> The total molar concentration of Al and Fe was 0.20 mmol/L.<sup>b</sup> Residual Al (mg/L).<sup>c</sup> Residual Fe (mg/L).<sup>d</sup> Removal rate of TP (%).<sup>e</sup> Removal rate of OD<sub>680</sub> (%).<sup>f</sup> Experimental value.<sup>g</sup> Predicted value.

**Table S2.** ANOVA for the regression coefficients and the significance test between the input variables and residual AI (R1).

| Source           | Sum of Squares | df | Mean Sqaure | F-value | p-value  |                 |
|------------------|----------------|----|-------------|---------|----------|-----------------|
| <b>Model</b>     | 0.0400         | 9  | 0.0044      | 16.21   | 0.0007   | significant     |
| A                | 0.0024         | 1  | 0.0024      | 8.69    | 0.0215   |                 |
| B                | 0.0001         | 1  | 0.0001      | 0.5273  | 0.4913   |                 |
| C                | 0.0208         | 1  | 0.0208      | 75.93   | < 0.0001 |                 |
| AB               | 0.0000         | 1  | 0.0000      | 0.0584  | 0.8160   |                 |
| AC               | 0.0000         | 1  | 0.0000      | 0.1788  | 0.6851   |                 |
| BC               | 9.000E-06      | 1  | 9.000E-06   | 0.0328  | 0.8613   |                 |
| A <sup>2</sup>   | 0.0004         | 1  | 0.0004      | 1.33    | 0.2868   |                 |
| B <sup>2</sup>   | 0.0010         | 1  | 0.0010      | 3.60    | 0.0997   |                 |
| C <sup>2</sup>   | 0.0158         | 1  | 0.0158      | 57.55   | 0.0001   |                 |
| <b>Residual</b>  | 0.0019         | 7  | 0.0003      |         |          |                 |
| Lack of Fit      | 0.0002         | 3  | 0.0001      | 0.1172  | 0.9454   | not significant |
| Pure Error       | 0.0018         | 4  | 0.0004      |         |          |                 |
| <b>Cor Total</b> | 0.0419         | 16 |             |         |          |                 |

**Table S3.** ANOVA for the regression coefficients and the significance test between the input variables and residual Fe (R2).

| Source           | Sum of Squares | df | Mean Sqaure | F-value | p-value  |                 |
|------------------|----------------|----|-------------|---------|----------|-----------------|
| <b>Model</b>     | 3.33           | 9  | 0.3695      | 236.22  | < 0.0001 | significant     |
| A                | 0.0013         | 1  | 0.0013      | 0.8314  | 0.3922   |                 |
| B                | 0.0063         | 1  | 0.0063      | 4.01    | 0.0853   |                 |
| C                | 0.7875         | 1  | 0.7875      | 503.42  | < 0.0001 |                 |
| AB               | 0.0000         | 1  | 0.0000      | 0.0313  | 0.8645   |                 |
| AC               | 0.0049         | 1  | 0.0049      | 3.13    | 0.1201   |                 |
| BC               | 0.0079         | 1  | 0.0079      | 5.06    | 0.0592   |                 |
| A <sup>2</sup>   | 0.0003         | 1  | 0.0003      | 0.2037  | 0.6654   |                 |
| B <sup>2</sup>   | 0.0067         | 1  | 0.0067      | 4.26    | 0.0778   |                 |
| C <sup>2</sup>   | 2.51           | 1  | 2.51        | 1602.91 | < 0.0001 |                 |
| <b>Residual</b>  | 0.0110         | 7  | 0.0016      |         |          |                 |
| Lack of Fit      | 0.0083         | 3  | 0.0028      | 4.24    | 0.0983   | not significant |
| Pure Error       | 0.0026         | 4  | 0.0007      |         |          |                 |
| <b>Cor Total</b> | 3.34           | 16 |             |         |          |                 |

**Table S4.** ANOVA for the regression coefficients and the significance test between the input variables and the removal rate of TP (R3).

| Source           | Sum of Squares | df | Mean Sqaure | F-value | p-value  |                 |
|------------------|----------------|----|-------------|---------|----------|-----------------|
| <b>Model</b>     | 14067.84       | 9  | 1563.09     | 197.38  | < 0.0001 | significant     |
| A                | 0.7257         | 1  | 0.7257      | 0.0916  | 0.7709   |                 |
| B                | 2.67           | 1  | 2.67        | 0.3366  | 0.5800   |                 |
| C                | 8014.15        | 1  | 8014.15     | 1012.00 | < 0.0001 |                 |
| AB               | 0.1159         | 1  | 0.1159      | 0.0146  | 0.9071   |                 |
| AC               | 9.37           | 1  | 9.37        | 1.18    | 0.3128   |                 |
| BC               | 18.75          | 1  | 18.75       | 2.37    | 0.1677   |                 |
| A <sup>2</sup>   | 8.25           | 1  | 8.25        | 1.04    | 0.3414   |                 |
| B <sup>2</sup>   | 5.65           | 1  | 5.65        | 0.7137  | 0.4261   |                 |
| C <sup>2</sup>   | 5927.27        | 1  | 5927.27     | 748.47  | < 0.0001 |                 |
| <b>Residual</b>  | 55.43          | 7  | 7.92        |         |          |                 |
| Lack of Fit      | 39.37          | 3  | 13.12       | 3.27    | 0.1412   | not significant |
| Pure Error       | 16.06          | 4  | 4.01        |         |          |                 |
| <b>Cor Total</b> | 14123.27       | 16 |             |         |          |                 |

**Table S5.** ANOVA for the regression coefficients and the significance test between the input variables and the removal rate of OD<sub>680</sub> (R4).

| Source           | Sum of Squares | df | Mean Sqaure | F-value | p-value  |                 |
|------------------|----------------|----|-------------|---------|----------|-----------------|
| <b>Model</b>     | 29870.23       | 9  | 3318.91     | 432.19  | < 0.0001 | significant     |
| A                | 0.1485         | 1  | 0.1485      | 0.0193  | 0.8933   |                 |
| B                | 12.68          | 1  | 12.68       | 1.65    | 0.2397   |                 |
| C                | 17191.79       | 1  | 17191.79    | 2238.70 | < 0.0001 |                 |
| AB               | 0.0000         | 1  | 0.0000      | 0.0000  | 1.0000   |                 |
| AC               | 20.24          | 1  | 20.24       | 2.64    | 0.1485   |                 |
| BC               | 4.44           | 1  | 4.44        | 0.5782  | 0.4719   |                 |
| A <sup>2</sup>   | 107.16         | 1  | 107.16      | 13.95   | 0.0073   |                 |
| B <sup>2</sup>   | 1.42           | 1  | 1.42        | 0.1848  | 0.6802   |                 |
| C <sup>2</sup>   | 12573.93       | 1  | 12573.93    | 1637.37 | < 0.0001 |                 |
| <b>Residual</b>  | 53.76          | 7  | 7.68        |         |          |                 |
| Lack of Fit      | 40.98          | 3  | 13.66       | 4.28    | 0.0971   | not significant |
| Pure Error       | 12.77          | 4  | 3.19        |         |          |                 |
| <b>Cor Total</b> | 29923.98       | 16 |             |         |          |                 |

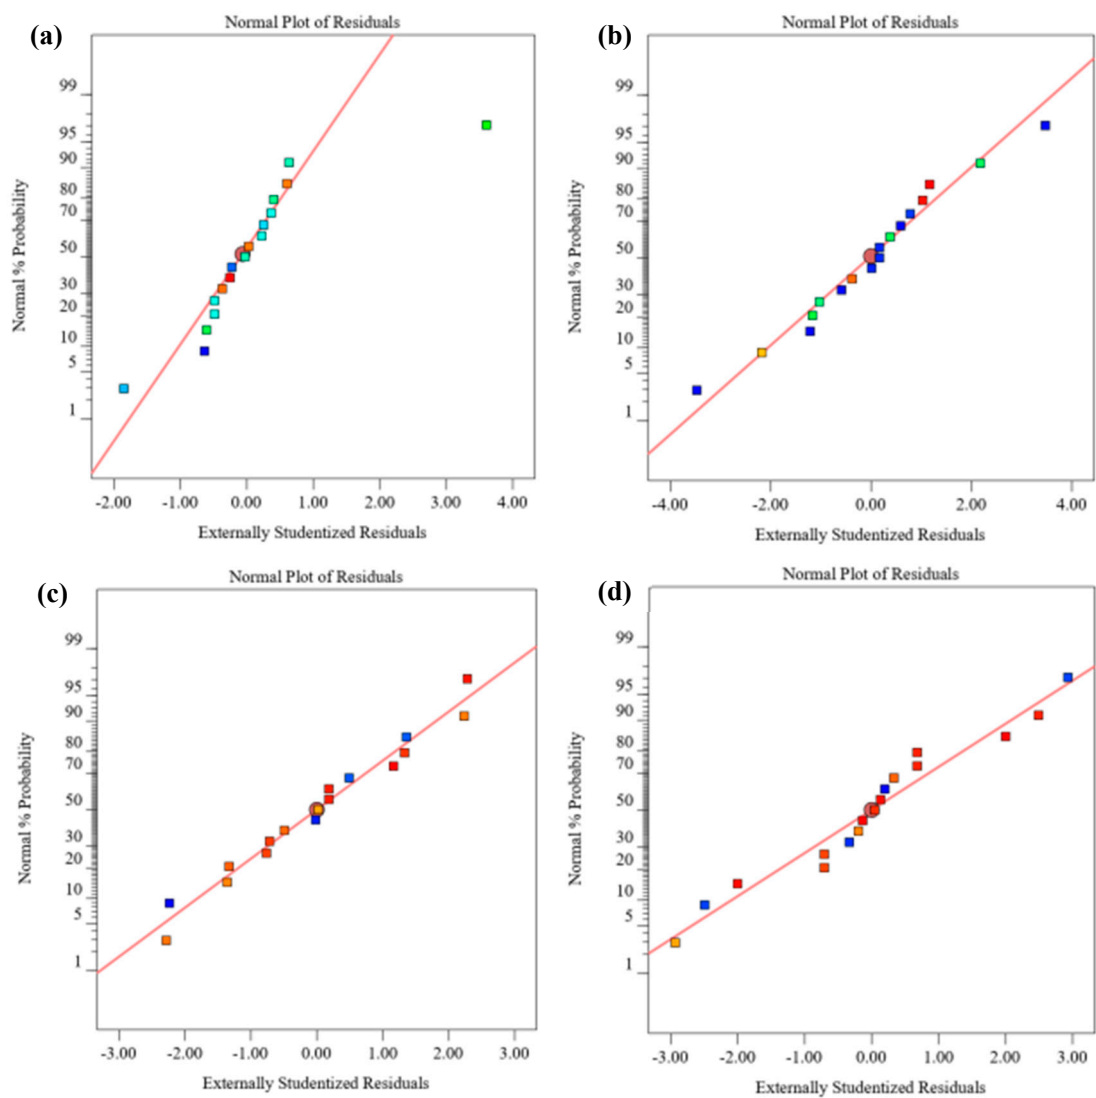

**Figure S4.** Normal plots of residuals of diagnostics for (a) R1: Residual Al (in mg/L), (b) R2: Residual Fe (in mg/L), (c) R3: the removal rate of TP (in %) and (d) R4: the removal rate of OD<sub>680</sub> (in %).

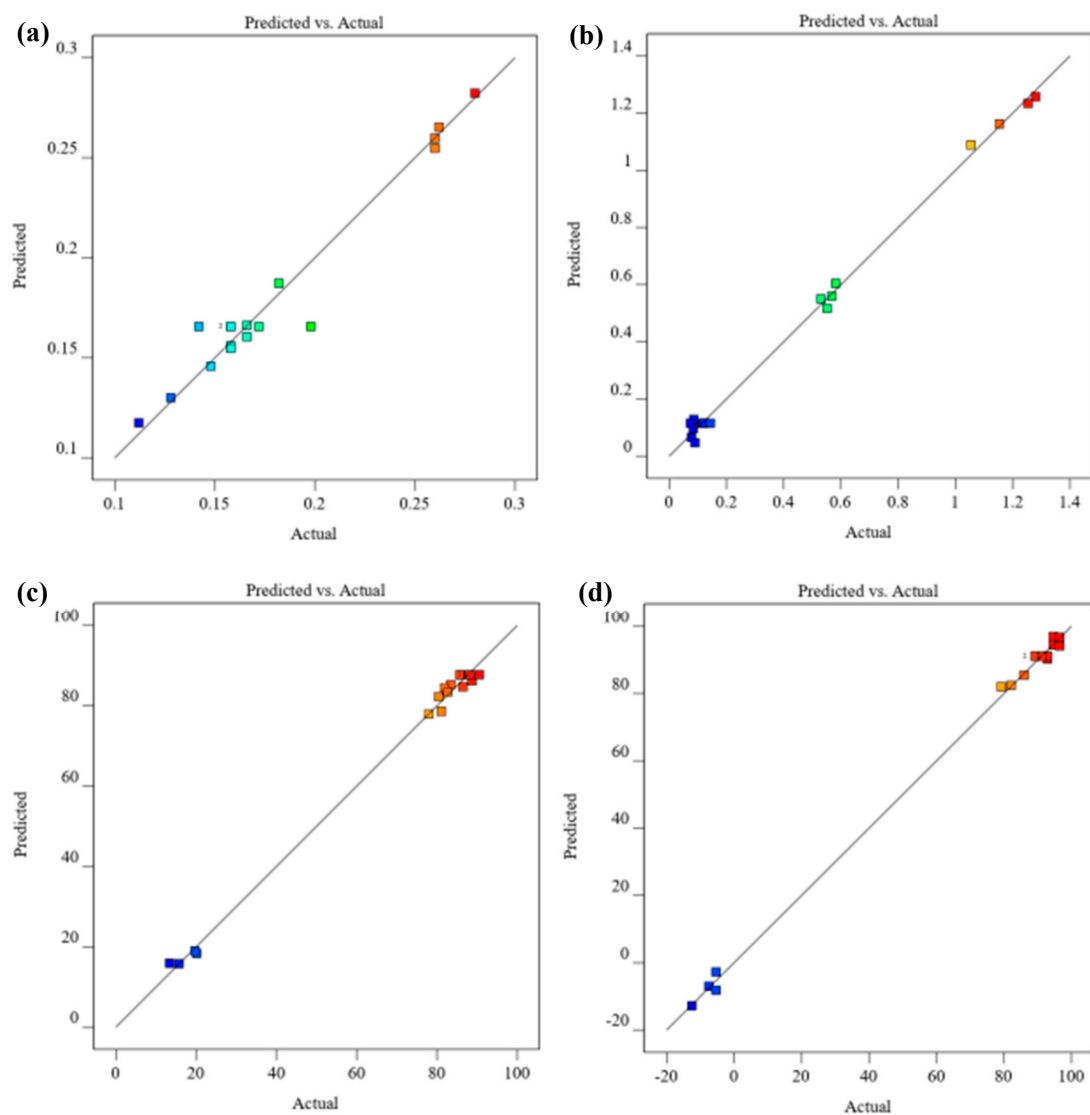

**Figure S5.** Predicted vs. actual plots in diagnostics for (a) R1: Residual Al (in mg/L), (b) R2: Residual Fe (in mg/L), (c) R3: the removal rate of TP (in %), (d) R4: the removal rate of OD<sub>680</sub> (in %).

FAS poly-coagulants with different  $n(\text{CO}_3^{2-}):n(\text{Al}+\text{Fe})$  were discussed to further verify its crucial effect on removal efficiencies.

Coagulation performance was highly achieved by FAS<sub>1-4</sub> and FAS<sub>13</sub> with  $n(\text{CO}_3^{2-}):n(\text{Al}+\text{Fe})$  of 1.75:1, and FAS<sub>13</sub> was selected for comparison with that of 1:1 and 2.5:1. Residual Al and residual Fe of FAS<sub>1-4</sub> and FAS<sub>13</sub> were below 0.200 and 0.300 mg/L, respectively, which are thresholds of standards for drinking water quality (GB5749–2006). Above 89.29% OD<sub>680</sub> was removed by FAS<sub>1-4</sub> and FAS<sub>13</sub>. Phosphorus is a key nutrient for the formation of cyanobacterial blooms, and the removal rates of total phosphorus (TP) is crucial to evaluate coagulation performances of FAS poly-coagulants. Removal efficiencies of TP increased from 81.89% to 90.55% with  $n(\text{Fe}):n(\text{Al})$  from 1:1 (FAS<sub>1</sub> and FAS<sub>3</sub>) to 2:1 (FAS<sub>13</sub>), but showed a decrease tendency when  $n(\text{Fe}):n(\text{Al})$  was up to 3:1 (FAS<sub>2</sub> and FAS<sub>4</sub>). Therefore, removal efficiencies of TP of FAS<sub>13</sub> were superior than FAS<sub>1-4</sub> and FAS<sub>13</sub> was selected.

Among FAS poly-coagulants with  $n(\text{CO}_3^{2-}):n(\text{Al}+\text{Fe})$  of 1:1, FAS<sub>5</sub> was selected for comparison with FAS<sub>13</sub>. Residual Al of FAS<sub>5</sub> was 0.182 mg/L, less than 0.200 mg/L. 81.10% TP and 92.86% OD<sub>680</sub> were removed by FAS<sub>5</sub> in coagulation. Even though the proportion of Fe was the lowest, residual Fe of FAS<sub>5</sub> was 1.280 mg/L, far above 0.300 mg/L, not to mention FAS<sub>6</sub> and FAS<sub>9-10</sub> with higher  $n(\text{Fe}):n(\text{Al})$ .

Among FAS poly-coagulants with  $n(\text{CO}_3^{2-}):n(\text{Al}+\text{Fe})$  of 2.5:1, FAS<sub>7</sub> was selected for comparison with FAS<sub>13</sub>. By using FAS<sub>7-8</sub> and FAS<sub>11-12</sub>, residual Al and residual Fe exceeded 0.200 mg/L and 0.300 mg/L, respectively, and the removal efficiency of OD<sub>680</sub> was very poor. However, the removal efficiency of TP reached the highest of 20.16% by FAS<sub>7</sub> with the lowest  $n(\text{Fe}):n(\text{Al})$ .

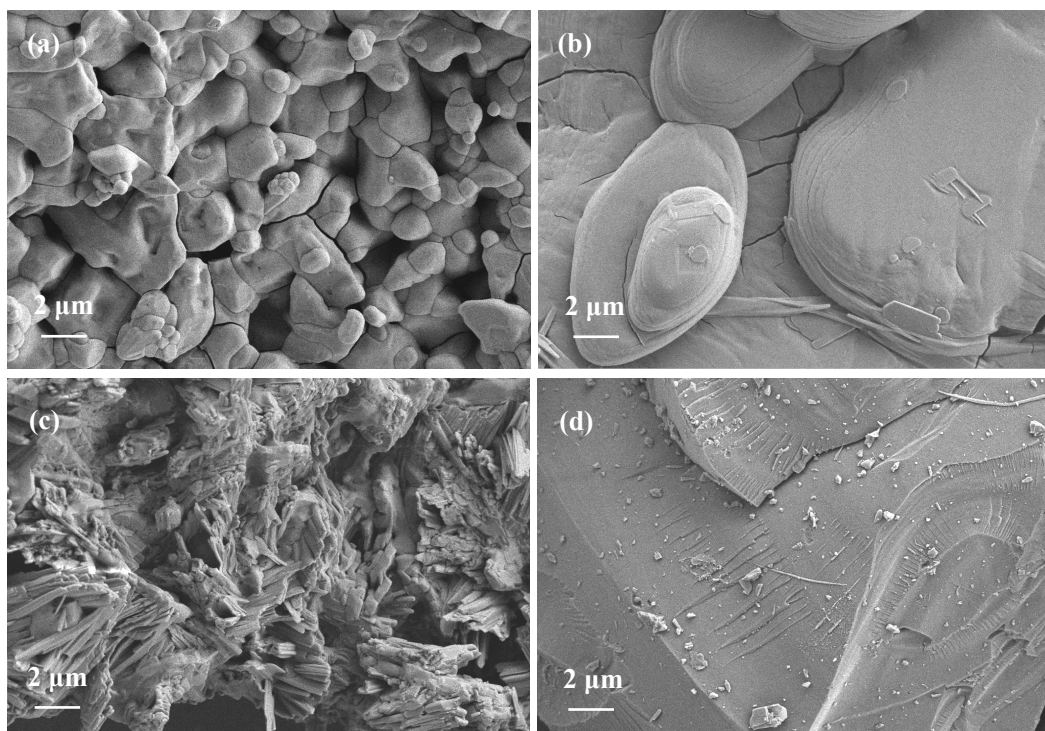

**Figure S6.** SEM images of raw materials: (a)  $\text{FeSO}_4 \cdot 7\text{H}_2\text{O}$ , (b)  $\text{Al}_2(\text{SO}_4)_3 \cdot 18\text{H}_2\text{O}$ , (c)  $\text{Na}_2\text{CO}_3$  and (d) hydrophobic  $\text{SiO}_2$ .

**Table S6.** Details of weight loss and corresponding temperature of FAS poly-coagulants.

| Samples           | Stage 1       |                     | Stage 2 |        | Stage 3 |        | Stage 4 |        |
|-------------------|---------------|---------------------|---------|--------|---------|--------|---------|--------|
|                   | $T^a$<br>(°C) | WL <sup>b</sup> (%) | T (°C)  | WL (%) | T (°C)  | WL (%) | T (°C)  | WL (%) |
| FAS <sub>13</sub> | 22.75         | 24.33               | 243.89  | 1.37   | 442.98  | 8.36   | 733.79  | 8.11   |
| FAS <sub>5</sub>  | 24.99         | 23.62               | 241.06  | 1.87   | 453.88  | 10.86  | 788.18  | 5.64   |
| FAS <sub>7</sub>  | 20.81         | 17.29               | 244.07  | 1.37   | 449.67  | 6.21   | 775.33  | 11.11  |

<sup>a</sup> Temperature.

<sup>b</sup> Weight loss.
